# Supplementary material for: Mixed valence copper oxide composites derived from metal–organic frameworks for efficient visible light fuel denitrification
Source: Royal Society of Chemistry journal article supplement (doi:10.1039/d3ra07532j), 2023-01-01
Supplement: d3ra07532j1.pdf [file d3ra07532j1.pdf]

## **Mixed valence copper oxide composites derived from metal-organic frameworks for efficient visible light fuel denitrification**

Jian Li,<sup>a</sup> Renkun Huang,<sup>\*bc</sup> Lu Chen,<sup>bc</sup> Yuzhou Xia,<sup>bc</sup> Guiyang Yan<sup>bc</sup> and Ruwen Liang<sup>\*bc</sup>

<sup>a</sup>. State Key Laboratory of Photocatalysis on Energy and Environment, Fuzhou University, Fuzhou 350002, China.

<sup>b</sup>. Province University Key Laboratory of Green Energy and Environment Catalysis, Ningde Normal University, Ningde 352100, China.

<sup>c</sup>. Fujian Provincial Key Laboratory of Featured Materials in Biochemical Industry, Ningde Normal University, Ningde 352100, China.

\*. Correspondence: t1432@ndnu.edu.cn (R.H.); t1629@ndnu.edu.cn (R.L.); Tel.: +86-15860671891 (R.H.); +86-15280318265 (R.L.).

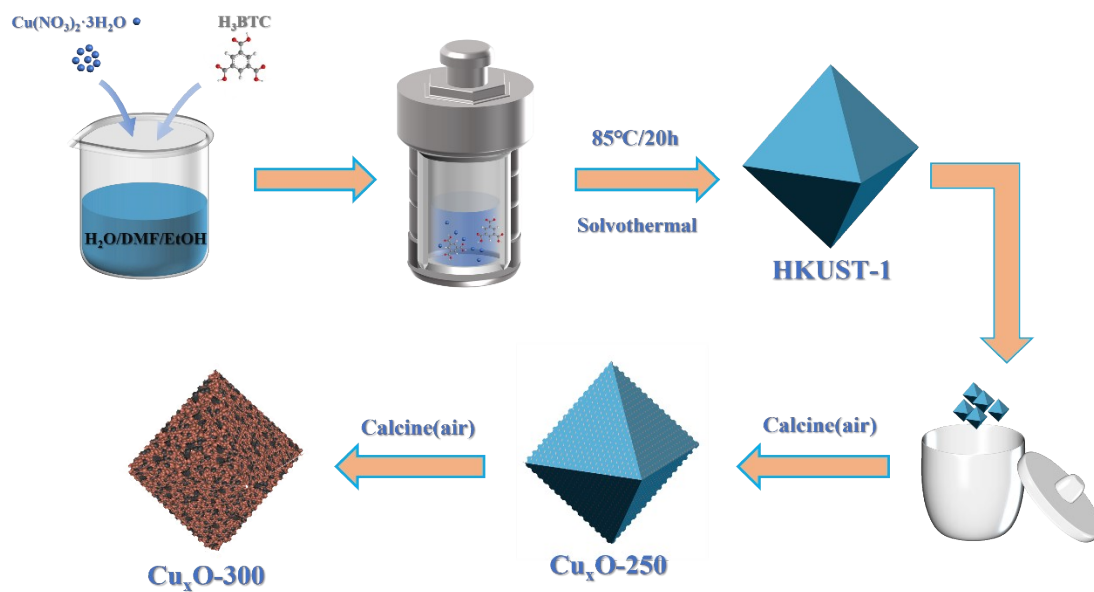

Fig. S1 Flow diagram for the fabrication of  $\text{Cu}_x\text{O}$ .

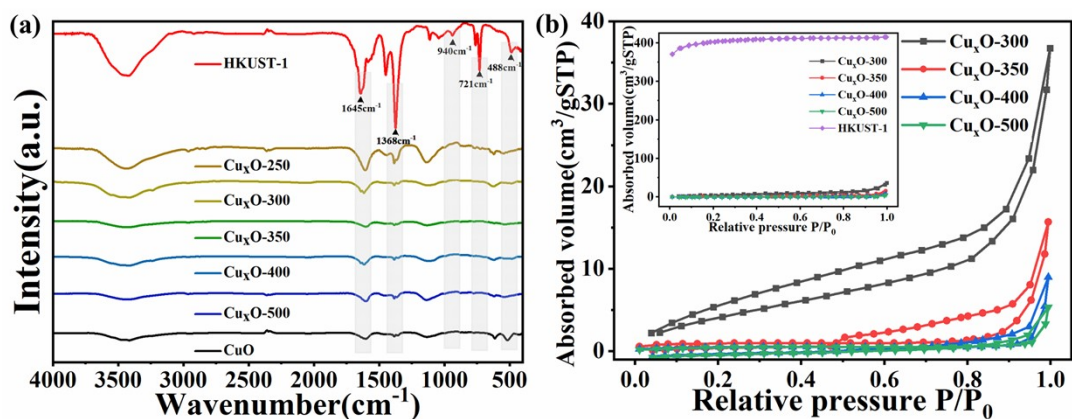

Fig. S2 (a) Fourier transform infrared reflectance spectra of samples and (b)  $\text{N}_2$  adsorption-desorption isotherms of synthetic catalysts.

Table S1 BET specific surface area and pore volume of the synthesized catalyst.

| Sample                    | BET surface area          | Pore volume                |
|---------------------------|---------------------------|----------------------------|
|                           | ( $\text{m}^2/\text{g}$ ) | ( $\text{cm}^3/\text{g}$ ) |
| $\text{Cu}_x\text{O-300}$ | 17.68                     | 0.154                      |
| $\text{Cu}_x\text{O-350}$ | 3.45                      | 0.024                      |
| $\text{Cu}_x\text{O-400}$ | 1.91                      | 0.013                      |
| $\text{Cu}_x\text{O-500}$ | 1.71                      | 0.008                      |
| HKUST-1                   | 1525.1                    | 0.642                      |

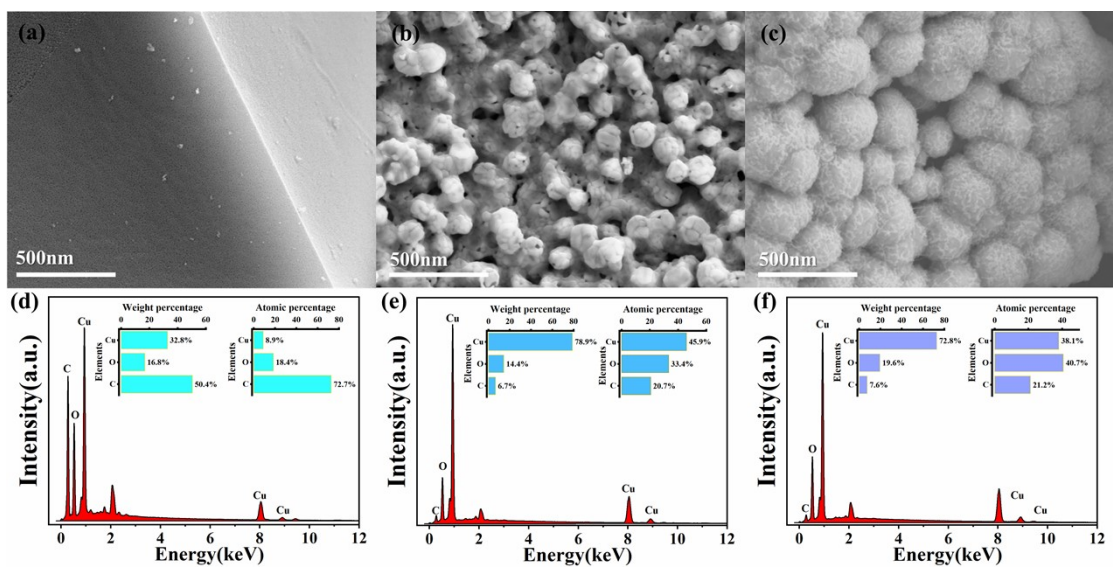

Fig. S3 (a-c) SEM image of Cu<sub>x</sub>O-250, Cu<sub>x</sub>O-300 and Cu<sub>x</sub>O-500, (d-f) EDS of Cu<sub>x</sub>O-250, Cu<sub>x</sub>O-300 and Cu<sub>x</sub>O-500

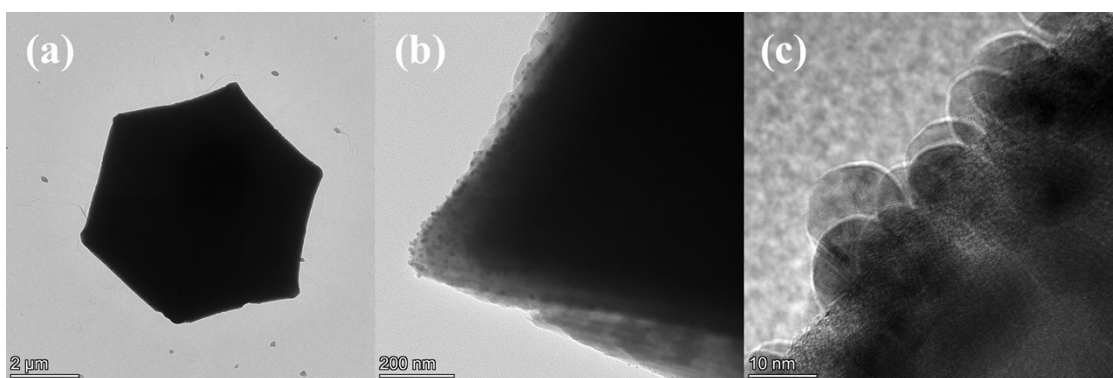

Fig. S4 (a-c) TEM image of HKUST-1.

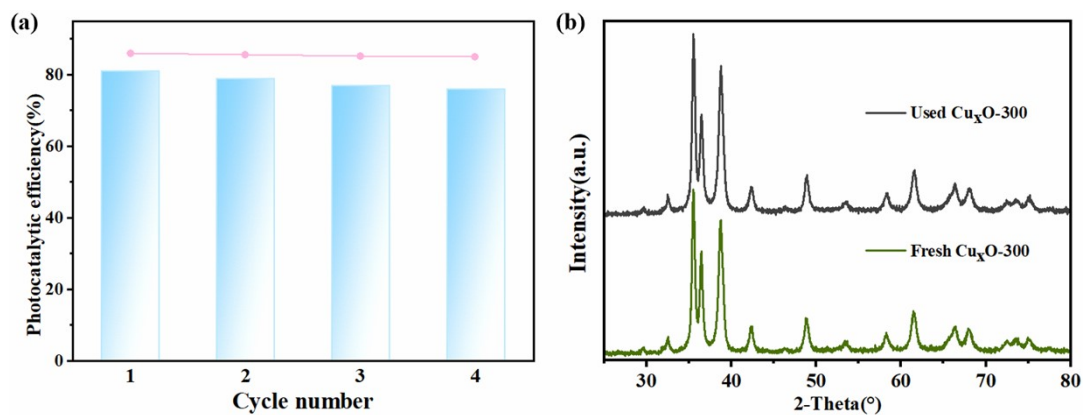

Fig. S5 (a) The cyclic experimental results of Cu<sub>x</sub>O-300 and (b) The XRD patterns of Cu<sub>x</sub>O-300 after four reaction cycles.

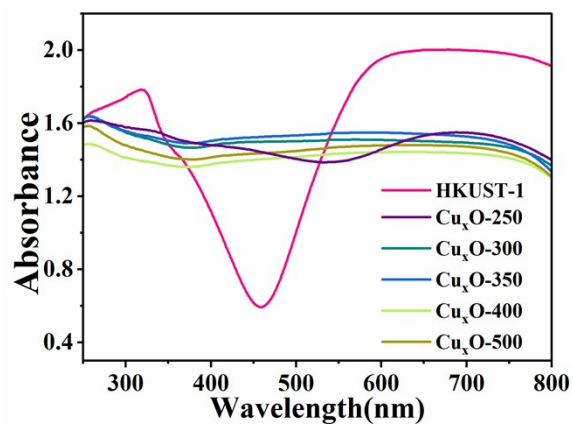

Fig. S6 UV-vis diffuse reflectance spectra of HKUST-1 and  $\text{Cu}_x\text{O-T}$ .

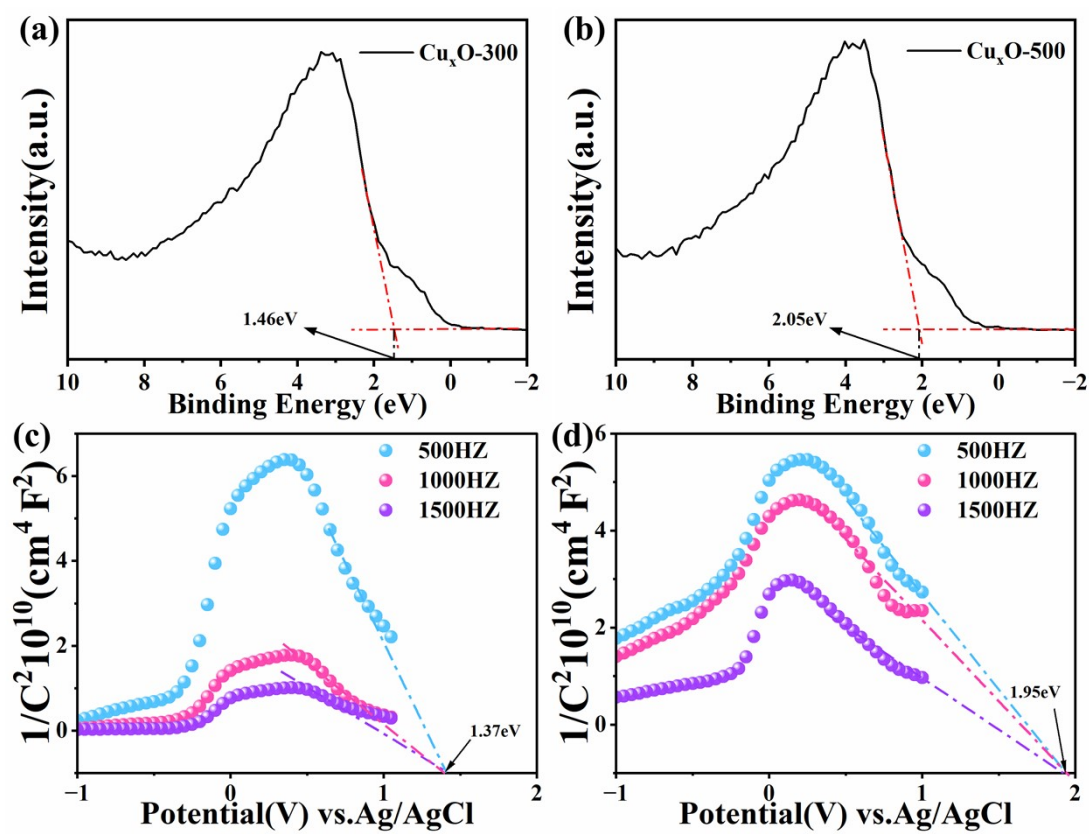

Fig. S7 (a, b) Valence band curves of  $\text{Cu}_x\text{O-300}$  and  $\text{Cu}_x\text{O-500}$ ; (c, d) Mott-Schottky plots of  $\text{Cu}_x\text{O-300}$  and  $\text{Cu}_x\text{O-500}$ .

**Table S2** Comparison between the photocatalytic activity of Cu<sub>x</sub>O-300 and that of other reported catalysts for pyridine denitrogenation.

| Photocatalysts                        | C pyridine (μg/g) | C cat. (mg/mL) | Light Source   | Denitrogenation efficiency (%) | Ref.      |
|---------------------------------------|-------------------|----------------|----------------|--------------------------------|-----------|
| Cu <sub>x</sub> O                     | 100               | 1.0            | 300W(λ >420nm) | 4.0h,81%                       | This work |
| Pd/ZnIn <sub>2</sub> S <sub>4</sub>   | 100               | 1.0            | 300W(λ >420nm) | 4.0h,80%                       | [R1]      |
| TiO <sub>2</sub> @MIL-101(Cr)         | 100               | 1.0            | 300W(λ >420nm) | 4.0h,70%                       | [R2]      |
| Bi <sub>2</sub> MoO <sub>6</sub> /CdS | 100               | 1.0            | 300W(λ >420nm) | 4.0h,81%                       | [R3]      |
| CoCu-ZIF                              | 100               | 1.0            | 300W(λ >420nm) | 4.0h,80%                       | [R4]      |

## References

- R1 D. Wang, E. Zhan, S. Wang, X. Liu, G. Yan, L. Chen and X. Wang, *Molecules*, 2023, **28**, 282.
- R2 Lu, Y., Liang, R., Yan, G., Liang, Z., Hu, W., Xia, Y. and Huang, R, *Journal of Fuel Chemistry and Technology*, 2022, **50**, 456-463.
- R3 W. Hu, M. Jiang, R. Liang, R. Huang, Y. Xia, Z. Liang and G. Yan, *Dalton Trans.*, 2021, **50**, 2596-2605.
- R4 Y. Lu, H. B. Pan, J. F. Lai, Y. Z. Xia, L. Chen, R. W. Liang, G. Y. Yan and R. K. Huang, *RSC Adv.*, 2022, **12**, 12702-12709.
